# Supplementary material
Source: HighWire-hosted journal article supplement (https://erj.ersjournals.com/content/58/1/2001584)
Supplement: inline-supplementary-material-4 [file inline-supplementary-material-4.pdf]

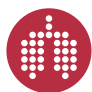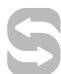

SHAREABLE PDF

# TLR2-mediated innate immune priming boosts lung anti-viral immunity

Jason Girkin<sup>1,2,6</sup>, Su-Ling Loo<sup>1,2,6</sup>, Camille Esneau<sup>1,2</sup>, Steven Maltby<sup>1,2</sup>, Francesca Mercuri<sup>3</sup>, Brendon Chua<sup>4</sup>, Andrew T. Reid<sup>1,2</sup>, Punnam Chander Veerati<sup>1,2</sup>, Chris L. Grainge<sup>2,5</sup>, Peter A.B. Wark<sup>2,5</sup>, Darryl Knight<sup>2</sup>, David Jackson<sup>4</sup>, Christophe Demaison<sup>3</sup> and Nathan W. Bartlett<sup>1,2</sup>

<sup>1</sup>Viral Immunology and Respiratory Disease group, University of Newcastle, Newcastle, Australia. <sup>2</sup>Priority Research Centre for Healthy Lungs, University of Newcastle and Hunter Medical Research Institute, Newcastle, Australia. <sup>3</sup>Ena Respiratory Pty Ltd, Melbourne, Australia. <sup>4</sup>Dept of Microbiology and Immunology, Peter Doherty Institute for Infection and Immunity, University of Melbourne, Melbourne, Australia. <sup>5</sup>Dept of Respiratory and Sleep Medicine, John Hunter Hospital, Newcastle, Australia. <sup>6</sup>These authors contributed equally.

Corresponding author: Nathan W. Bartlett ([nathan.bartlett@newcastle.edu.au](mailto:nathan.bartlett@newcastle.edu.au))

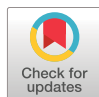

Shareable abstract (@ERSpublications)

**TLR2-agonist treatment to the respiratory tract activates airway epithelial cells to prime the innate immune system to rapidly respond to infection and reduce virus-induced inflammation, including in the context of corticosteroid treatment and in asthma** <https://bit.ly/3g02Q4M>

**Cite this article as:** Girkin J, Loo S-L, Esneau C, *et al.* TLR2-mediated innate immune priming boosts lung anti-viral immunity. *Eur Respir J* 2021; 58: 2001584 [DOI: 10.1183/13993003.01584-2020].

This single-page version can be shared freely online.

Copyright ©ERS 2021. For reproduction rights and permissions contact [permissions@ersnet.org](mailto:permissions@ersnet.org)

This article has supplementary material available from [erj.ersjournals.com](http://erj.ersjournals.com)

Received: 5 May 2020  
Accepted: 27 Nov 2020

## Abstract

**Background** We assessed whether Toll-like receptor (TLR)2 activation boosts the innate immune response to rhinovirus infection, as a treatment strategy for virus-induced respiratory diseases.

**Methods** We employed treatment with a novel TLR2 agonist (INNA-X) prior to rhinovirus infection in mice, and INNA-X treatment in differentiated human bronchial epithelial cells derived from asthmatic-donors. We assessed viral load, immune cell recruitment, cytokines, type I and III interferon (IFN) production, as well as the lung tissue and epithelial cell immune transcriptome.

**Results** We show, *in vivo*, that a single INNA-X treatment induced innate immune priming characterised by low-level IFN- $\lambda$ , Fas ligand, chemokine expression and airway lymphocyte recruitment. Treatment 7 days before infection significantly reduced lung viral load, increased IFN- $\beta/\lambda$  expression and inhibited neutrophilic inflammation. Corticosteroid treatment enhanced the anti-inflammatory effects of INNA-X. Treatment 1 day before infection increased expression of 190 lung tissue immune genes. This tissue gene expression signature was absent with INNA-X treatment 7 days before infection, suggesting an alternate mechanism, potentially *via* establishment of immune cell-mediated mucosal innate immunity. *In vitro*, INNA-X treatment induced a priming response defined by upregulated IFN- $\lambda$ , chemokine and anti-microbial gene expression that preceded an accelerated response to infection enriched for nuclear factor (NF)- $\kappa$ B-regulated genes and reduced viral loads, even in epithelial cells derived from asthmatic donors with intrinsic delayed anti-viral immune response.

**Conclusion** Airway epithelial cell TLR2 activation induces prolonged innate immune priming, defined by early NF- $\kappa$ B activation, IFN- $\lambda$  expression and lymphocyte recruitment. This response enhanced anti-viral innate immunity and reduced virus-induced airway inflammation.
